# Supplementary material for: Role of TLRs in HIV-1 Infection and Potential of TLR Agonists in HIV-1 Vaccine Development and Treatment Strategies
Source: MDPI journal article supplement (doi:10.3390/pathogens12010092), 2023-01-05
Supplement: s1 [file s1]

**Table S1.** The selected list of TLR genetic polymorphisms and their association with HIV-infection and co-infections

| GENE | SNP/<br>polymorphism            | Study                       | Population                                           | Susceptibility                                                         | Clinical findings                                            |
|------|---------------------------------|-----------------------------|------------------------------------------------------|------------------------------------------------------------------------|--------------------------------------------------------------|
| TLR1 | rs5743551,<br>rs5743618         | Willie et al 2014 [55]      | North America,<br>Caucasian,<br>Africans<br>ancestry | SA with<br>HIV-1 infection in<br>Caucasians                            | NA                                                           |
| TLR1 | GTGT                            | Willie et al 2014 [55]      | North America,<br>Caucasian,<br>Africans<br>ancestry | SA with HIV infection in<br>Caucasians                                 | NA                                                           |
| TLR1 | ATGG                            | Willie et al 2014 [55]      | North America,<br>Caucasian,<br>Africans<br>ancestry | Protective against HIV in<br>Caucasians                                | NA                                                           |
| TLR1 | rs5743618,<br>rs4833095         | Varshney et al 2022<br>[82] | various                                              | Association between TB<br>disease in a particular ethnic<br>population | The protection against<br>TB                                 |
| TLR2 | rs111200466<br>196 -174 Ins/Del | Vidyant et al 2017 [56]     | North Indian                                         | SA with<br>HIV-1 infection                                             | Associated with<br>reduced<br>risk of disease<br>progression |
| TLR2 | rs111200466<br>196 -174 Ins/Del | Royo et al 2020 [57]        | Spanish                                              | Protective against HIV<br>infection                                    | NA                                                           |
| TLR2 | rs111200466<br>196 -174 Ins/Del | Laplana et al 2020 [58]     | Spanish                                              | Associated with elevated risk<br>of HIV infection                      | Associated with faster<br>disease progression                |
| TLR2 | rs3804099<br>196 -174 Ins/Del   | Shi et al 2020 [54]         | various                                              |                                                                        | Associated with<br>HIV-1 infection<br>clinical results       |
| TLR2 | 2180 C/T, C/C, C/T              | Kaushik et al 2022 [59]     | North Indian                                         | NS to HIV and TB                                                       | NS among different<br>patient groups                         |

|               |                              |                                |                                           |                                                                            |                                                                                                 |
|---------------|------------------------------|--------------------------------|-------------------------------------------|----------------------------------------------------------------------------|-------------------------------------------------------------------------------------------------|
| TLR2          | rs3804100<br>1350 C/C        | Beima-Sofie et al 2013<br>[74] | Kenyan, infants                           | Associated with<br>HIV-1 infection                                         | Associated with time<br>of mortality in female<br>infants infected                              |
| TLR2          | rs3804099<br>597T/C          | Bochud et al 2007 [78]         | Swiss                                     | NA with protection against<br>rapid progression                            | NA                                                                                              |
| TLR2_TLR<br>6 | TGTTG GTCTCA                 | Willie et al 2014 [55]         | North America,<br>Caucasian,<br>Africans  | Protective against HIV, SA in<br>Caucasians                                | NA                                                                                              |
| TLR2          | rs3804099<br>-196 to 174 del | Varshney et al 2022<br>[82]    | Various                                   | association between TB<br>disease in a particular ethnic<br>population     | The protection against<br>TB                                                                    |
| TLR3          | rs3775291<br>1660 C/T        | Huik et al 2013 [61]           | Caucasian                                 | Protective effect<br>against HIV infection                                 | NA                                                                                              |
| TLR3          | rs3775296                    | Habibabadi et al 2020<br>[63]  | Iranian                                   | SA with HTLV-1 infection,<br>may be protective against<br>HTLV-1 infection | NA                                                                                              |
| TLR4          | rs4986790<br>896A/G          | Vidyant et al 2019 [62]        | Indian                                    | Associated with<br>HIV-1 infection                                         | Linked with stage<br>progression, not with<br>CD4 count decrease, G<br>allele higher in stage I |
| TLR4          | rs4986790<br>896A/G          | Jabłońska et al 2020<br>[66]   | Caucasian,<br>children and<br>adolescents | Associated with the risk of<br>infectious mononucleosis                    | Elevated liver enzyme<br>levels and leukocytes                                                  |
| TLR4          | rs4986790<br>896A/G          | Kaushik et al 2022 [59]        | North Indian                              | SI to active TB and HIV+<br>patients (P < 0.001)                           | SA among different<br>groups                                                                    |
| TLR4          | rs4986790<br>1063A/G         | Shi et al 2020 [54]            | various                                   | NA                                                                         | Associated with<br>HIV-1 infection<br>clinical results                                          |
| TLR4          | rs4986791<br>1196C/T         | Vidyant et al 2019 [62]        | Indian                                    | No link to HIV infection                                                   | No link to stage<br>progression                                                                 |

|      |                                                  |                                  |                                 |                                                                                                    |                                                                                                 |
|------|--------------------------------------------------|----------------------------------|---------------------------------|----------------------------------------------------------------------------------------------------|-------------------------------------------------------------------------------------------------|
| TLR4 | rs4986790<br>rs4986791                           | Willie et al 2014 [55]           | North America,<br>Caucasian, AA | No association in either racial<br>groups, associate with HIV<br>status                            | NA                                                                                              |
| TLR4 | rs7873784                                        | Willie et al 2014 [55]           | North America,<br>Caucasian, AA | SA in Afroamericans                                                                                | NA                                                                                              |
| TLR4 | rs10759932                                       | Willie et al 2014 [55]           | North America,<br>Caucasian, AA | SA in Caucasians                                                                                   | NA                                                                                              |
| TLR4 | AGCACGG                                          | Willie et al 2014 [55]           | North America,<br>Caucasian, AA | SA in HIV infection in<br>Caucasians                                                               | NA                                                                                              |
| TLR4 | rs4986791, G allele                              | Kim et al 2020 [64]              | Caucasian and<br>Asian          | Strong association to HIV<br>infection                                                             | Allele G significant<br>risk factor                                                             |
| TLR4 | rs4986790<br>rs4986791                           | Tarancon-Diez et al<br>2018 [67] | Spanish                         | Asp299Gly independently<br>associated with the<br>occurrence of CVDs in HIV-<br>infected patients. | The proinflammatory<br>profile could be<br>involved in the<br>development of<br>atherosclerosis |
| TLR4 | rs4986790<br>896A/G                              | Beima-Sofie et al 2013<br>[59]   | Kenyan, infants                 | NA with HIV infection                                                                              | Not associated with<br>disease progression                                                      |
| TLR4 | rs4986790<br>896A/G                              | Bochud et al 2007 [78]           | Swiss                           | NA with HIV infection                                                                              | Not associated with<br>disease progression                                                      |
| TLR4 | rs4986790<br>rs4986791<br>rs7873784              | Varshney et al 2022<br>[82]      | Various                         | association between TB<br>disease in a particular ethnic<br>population                             | The protection against<br>TB                                                                    |
| TLR6 | rs5743810<br>rs5743806<br>rs1039559<br>rs3775073 | Willie et al 2014 [55]           | North America,<br>Caucasian     | SA with HIV status, in<br>Caucasians, possible<br>protective effect of<br>rs5743810                | NA                                                                                              |
| TLR6 | rs3796508 G/A                                    | Onyishi et al 2021 [60]          | various studies                 | higher risk of cryptococcal<br>meningitis in HIV-negative<br>patients                              |                                                                                                 |

|      |                    |                                   |                                            |                                                                            |                                                                                      |
|------|--------------------|-----------------------------------|--------------------------------------------|----------------------------------------------------------------------------|--------------------------------------------------------------------------------------|
| TLR6 | rs3804099 C/T      | Onyishi et al 2021 [60]           | various studies                            | higher risk of cryptococcal meningitis in HIV-negative patients            | associated with cerebrospinal fluid cytokine expression                              |
| TLR6 | rs5743810          | Varshney et al 2022 [82]          | various                                    | association between TB disease in a particular ethnic population           | The protection against TB                                                            |
| TLR7 | rs179008           | Shi et al 2020 [54]               | various                                    | Associated with HIV infection, T allele provides risk effect for infection | NA                                                                                   |
| TLR7 | rs179008, A/A      | Said et al 2014 [68]              | Omani                                      | Associated with HIV acquisition                                            | Increased VL and high CD4T cell count                                                |
| TLR7 | rs179008, A/A      | Anokhin et al 2016 [69]           | Tatarstan, Russia                          | Significant correlations                                                   | Increased VL and altered CD4T cell count                                             |
| TLR7 | rs179008, T allele | Oh et al 2009 [72]                | German                                     | Associated to HIV-1                                                        | T allele linked to high VL, low CD4, faster progression, advanced immune suppression |
| TLR7 | rs179008, TC, CC   | Valverde-Villegas et al 2017 [80] | Brazilians - European and African ancestry | Not associated to HIV-1 infection                                          | NA                                                                                   |
| TLR7 | rs179008           | Singh et al 2020 [73]             | West Indian, Naive to ART                  | NS                                                                         | TT genotype could protect against the advancement of HIV in early disease            |
| TLR7 | rs179008, A/T      | Shaikh et al 2019 [71]            | Indian                                     | NS                                                                         | NS                                                                                   |
| TLR7 | rs179008, A/T      | Beima-Sofie et al 2013 [59]       | Kenyan, infants                            | NA                                                                         | Trend for association to mortality in female infants                                 |
| TLR7 | rs179009, A/G      | Zhang et al 2020 [70]             | Chinese, MSM                               | NS for acute infection, allele G and CTG haplotype                         | Higher set point and rapid progression for allele A                                  |

|      |                                                 |                             |                              |                                                                                                          |                                                                                                                |
|------|-------------------------------------------------|-----------------------------|------------------------------|----------------------------------------------------------------------------------------------------------|----------------------------------------------------------------------------------------------------------------|
|      |                                                 |                             |                              | associated with chronic infection                                                                        |                                                                                                                |
| TLR7 | rs179010, C/T<br>rs2074109, T/C<br>rs179009 A/G | Zhang et al 2020 [70]       | Chinese, MSM                 | TTA haplotype associated to lower susceptibility in acute HIV infection, but not in chronic              | AHI patients with TTA haplotype linked to slower disease progression and lower viral loads                     |
| TLR7 | rs2074109, G allele                             | Shaikh et al 2019 [71]      | Indian                       | Associated with HIV infection, G allele less likely to associate with HIV, predisposition factor for HIV | NS                                                                                                             |
| TLR7 | rs179009, T/C                                   | Shaikh et al 2019 [71]      | Indian                       | NS                                                                                                       | NS                                                                                                             |
| TLR7 | rs179009 A/G                                    | Singh et al 2020 [73]       | West Indian, Naive to ART    | NS, lower risk of HIV-1 infection for AG and AG-GG                                                       | A/G genotype could protect the advancement of HIV in advanced disease                                          |
| TLR7 | rs179010 C/T                                    | Zhang et al 2020 [70]       | Chinese, MSM                 | Allele T associated with decreased susceptibility                                                        | Allele T associated with slow progression in acute HIV infection                                               |
| TLR7 | rs2074109 T/C                                   | Zhang et al 2020 [70]       | Chinese, MSM                 | NS for acute HIV infection                                                                               | NA                                                                                                             |
| TLR7 | rs1634319                                       | Beima-Sofie et al 2013 [59] | Kenyan, infants              | NA                                                                                                       | VL in female infants infected by 12 months, VL NS in female infants infected by 1 month, VL NS in male infants |
| TLR8 | rs2159377<br>354C/T                             | Willie et al 2014 [55]      | North America, Caucasian, AA | Associated with HIV status, SA in AA, potentially protective against HIV in AA                           | NA                                                                                                             |

|      |                       |                                   |                                                 |                                                                                                                        |                                                                                              |
|------|-----------------------|-----------------------------------|-------------------------------------------------|------------------------------------------------------------------------------------------------------------------------|----------------------------------------------------------------------------------------------|
| TLR8 | rs3764880             | Valverde-Villegas et al 2017 [80] | South Brazil - European and African descendants | Not associated to HIV-1 infection                                                                                      | NA                                                                                           |
| TLR8 | rs3764880, rs2407992  | Willie et al 2014 [55]            | North America, Caucasian, AA                    | SA with HIV status, SA in Casucasians                                                                                  | NA                                                                                           |
| TLR8 | rs3764880 A/G         | Beima-Sofie et al 2013 [59]       | Kenyan, infants                                 | SA with reduced progression                                                                                            | higher VL in female infants, NS of VL in male infants                                        |
| TLR9 | 1174 C/T              | Jabłońska et al 2020 [66]         |                                                 | Associated with the risk of infectious mononucleosis                                                                   | Related to the course of acute EBV infection                                                 |
| TLR9 | rs187084 1486C/T      | Joshi et al 2019 [76]             | American, mostly Hispanic                       | NS                                                                                                                     | Link to disease progression, weak correlation to lower CD4 count, higher CD8 and IP10 levels |
| TLR9 | rs352140,G/G genotype | Shi et al 2020 [54]               | various                                         | May associate with increased risk of HIV infection                                                                     | NA                                                                                           |
| TLR9 | rs352140 1635 A/G     | Kaushik et al 2022 [59]           | North Indian                                    | Increased frequenca of A allele in active TB development of naive HIV+ patients                                        | NA                                                                                           |
| TLR9 | rs5743836, C allele   | Valverde-Villegas et al 2017 [80] | South Brazil-European and African descendants   | C allele more susceptible to HIV in European descendants. C/T genotype protective against HIV-1 in African descendants | NA                                                                                           |
| TLR9 | rs352140              | Valverde-Villegas et al 2017 [80] | South Brazil-European and African descendants   | NA to HIV-1 infection. A/A genotype higher in the HIV+/HCV+ group in African descendants                               | NA                                                                                           |

|      |                                 |                              |                                  |                                                            |                                                                                                  |
|------|---------------------------------|------------------------------|----------------------------------|------------------------------------------------------------|--------------------------------------------------------------------------------------------------|
| TLR9 | rs352140<br>1635 G/G, A/G       | Said et al 2014 [68]         | Indian                           | Associated with HIV acquisition                            | GG associated with lower CD4 T-cell count. AG related to higher CD4 T- cell count                |
| TLR9 | rs352140<br>1635 A/G            | Shaikh et al 2019 [71]       | Indian                           | NS                                                         | Less likely to associate with HIV progression, allele A associated with slow disease progression |
| TLR9 | rs352140<br>1635A/G,<br>1174G/A | Bochud et al 2007 [78]       | Swiss                            | NA                                                         | Associated with rapid progression, not with slow progressors                                     |
| TLR9 | rs352140<br>1635A/G             | Joshi et al 2019 [76]        | Americans,<br>mostly<br>Hispanic | NA                                                         | Link to disease progression (higher VL and faster progression)                                   |
| TLR9 | rs352140<br>1635A/A             | Vallejo et al 2020 [77]      | Spanish                          | NA                                                         | Associated with higher HIV rebound after ART interruption, may impact outcomes                   |
| TLR9 | rs352140<br>2848 G/A            | Kulmann-Leal et al 2022 [79] | Brazilians                       | Potential influence on viral infection                     | GG genotype serving as protective factor for non-Caucasians                                      |
| TLR9 | rs352140<br>2848 C/T            | Jabłońska et al 2021 [81]    | Polish, children and adolescents | Association with CMV infected HIV/CMV co-infected subjects | CMV DNAemia among HIV-infected patients with CMV                                                 |
| TLR9 | rs5743836<br>-1237T/C           | Varshney et al 2022 [82]     | various                          | The protection against TB                                  | The protection against TB linked                                                                 |

*Abbreviations: ART- antiretroviral treatment, CMV- cytomegalovirus, CVDs- cardiovascular diseases, EBV- Epstein-Barr virus, HIV- human immunodeficiency virus, MSM- men who have sex with men, NA- not available, NS- non significant, SA- significant association, SNP- single nucleotide polymorphism, TB- tuberculosis, VL- viral load*
